# Supplementary material for: Integrated genome-wide analysis of transcription factor occupancy, RNA polymerase II binding and steady-state RNA levels identify differentially regulated functional gene classes
Source: PubMed Central journal article supplement — Nucleic Acids Res. 2011 Sep 13;40(1):148–58. doi: 10.1093/nar/gkr720 (PMC3245935; doi:10.1093/nar/gkr720), 2011-09-13
Supplement: supp_gkr720_nar-01684-h-2011-File008.pdf [file supp_gkr720_nar-01684-h-2011-File008.pdf]

**Supplementary Figure 1:** Raw scores used for calculation of TTAS for five transcription factors depending on the distance from transcription start site of the associated gene

**Supplementary Figure 2:** Comparison of Pol II occupancy and RNA levels as measured by RNA-seq and microarrays and their reproducibility over 21,854 RefSeq genes

**Supplementary figure 3:** Examples of Pol II and RNA-seq coverage over differentially expressed genes under two experimental conditions.

**Supplementary Figure 4:** Correlation of TF occupancy with Pol II ChIP-seq and RNA-seq data from ENCODE datasets.

**Supplementary Figure 5:** Effect of poised polymerase and polymerase accumulated on 3'-UTRs on the correlation of Pol II ChIP-seq with transcription factor occupancy

**Supplementary Figure 6** Pol II occupancy on chromosome 1

**Supplementary Figure 7** Rank analysis of Pol II occupancy with empirically defined gene classes (I, II, III)

**Supplementary Table** Sequencing and mapping statistics

Supplementary Material 1: Lists of transcription factor binding sites called from ChIP-seq experiments

Supplementary Material 2: Datasets used from ENCODE project

Supplementary Material 3: Enrichment of GO terms in Wnt target genes identified by 3 different methods

Supplementary Material 4: Enriched GO terms in 3 gene classes

## Supplementary Figures

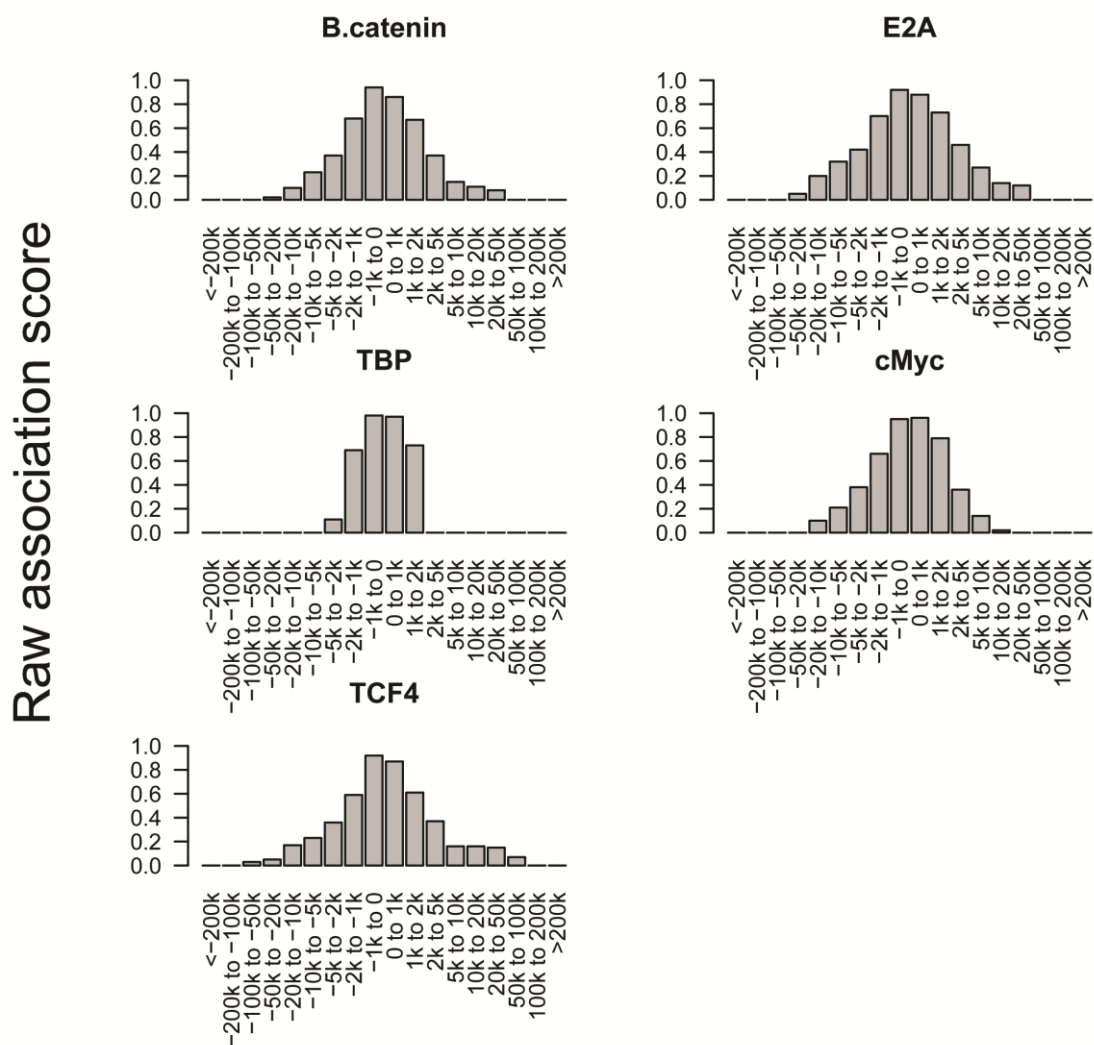

## Binding site location relatively to TSS

**Supplementary Figure 1: Raw scores used for calculation of TTAS for five transcription factors depending on the distance from transcription start site of the associated gene. TTAS scores reflect the likelihood of a gene being regulated by a given transcription factor within set distance from gene's TSS. Some transcription factor binding sites are distributed exclusively close to transcription start sites. Others can regulate more distant genes.**

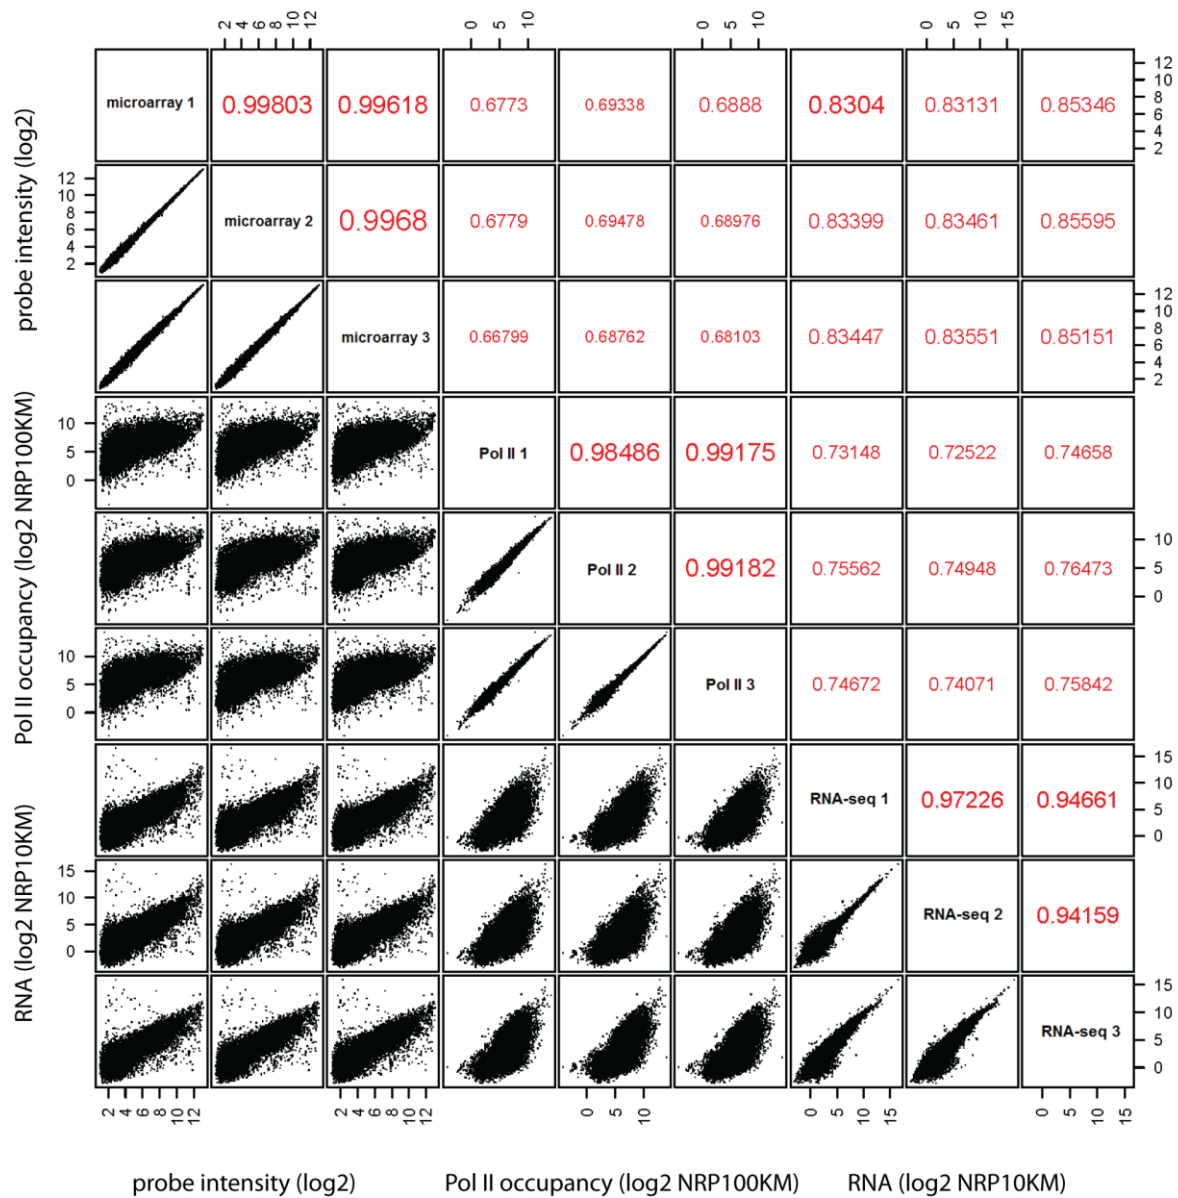

**Supplementary Figure 2: Comparison of Pol II occupancy and RNA levels as measured by RNA-seq and microarrays and their reproducibility over 21,854 RefSeq genes.** Each method shows good reproducibility between all 3 replicates. Correlations between different methods are decreased. Red numbers represent pairwise Pearson's correlation coefficients.

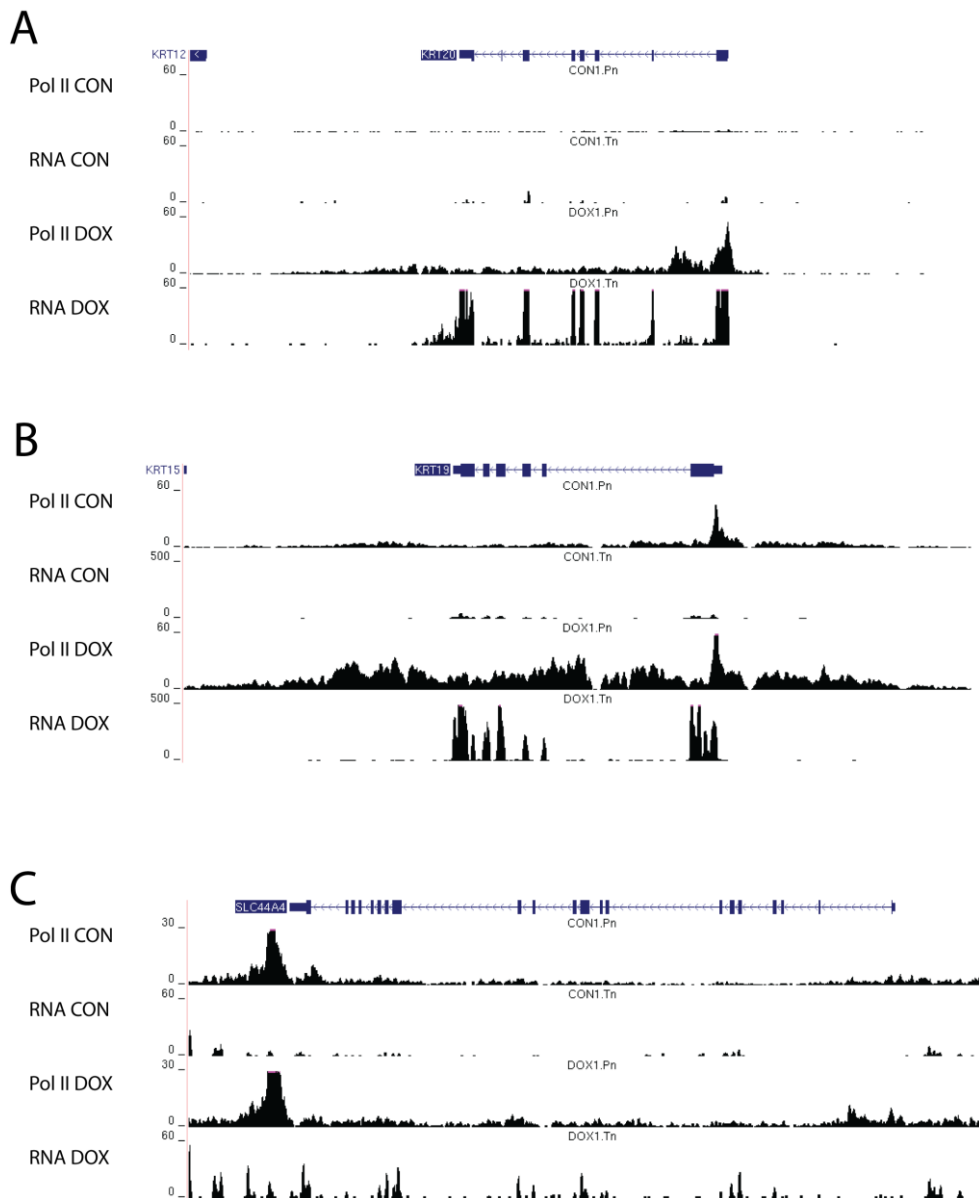

**Supplementary figure 3: Examples of Pol II and RNA-seq coverage over differentially expressed genes under two experimental conditions.** Vertical axis represents sequencing tags coverage per position A)B) Upregulated genes shows increase in tag density for both Pol II and RNA-seq. C) Pol II tag density over gene body is increased less extensively after doxycycline treatment compared to RNA levels of this gene. Up-regulation of gene comes with increased mRNA stability. Control sample - CON and doxycyclin treated sample - DOX.

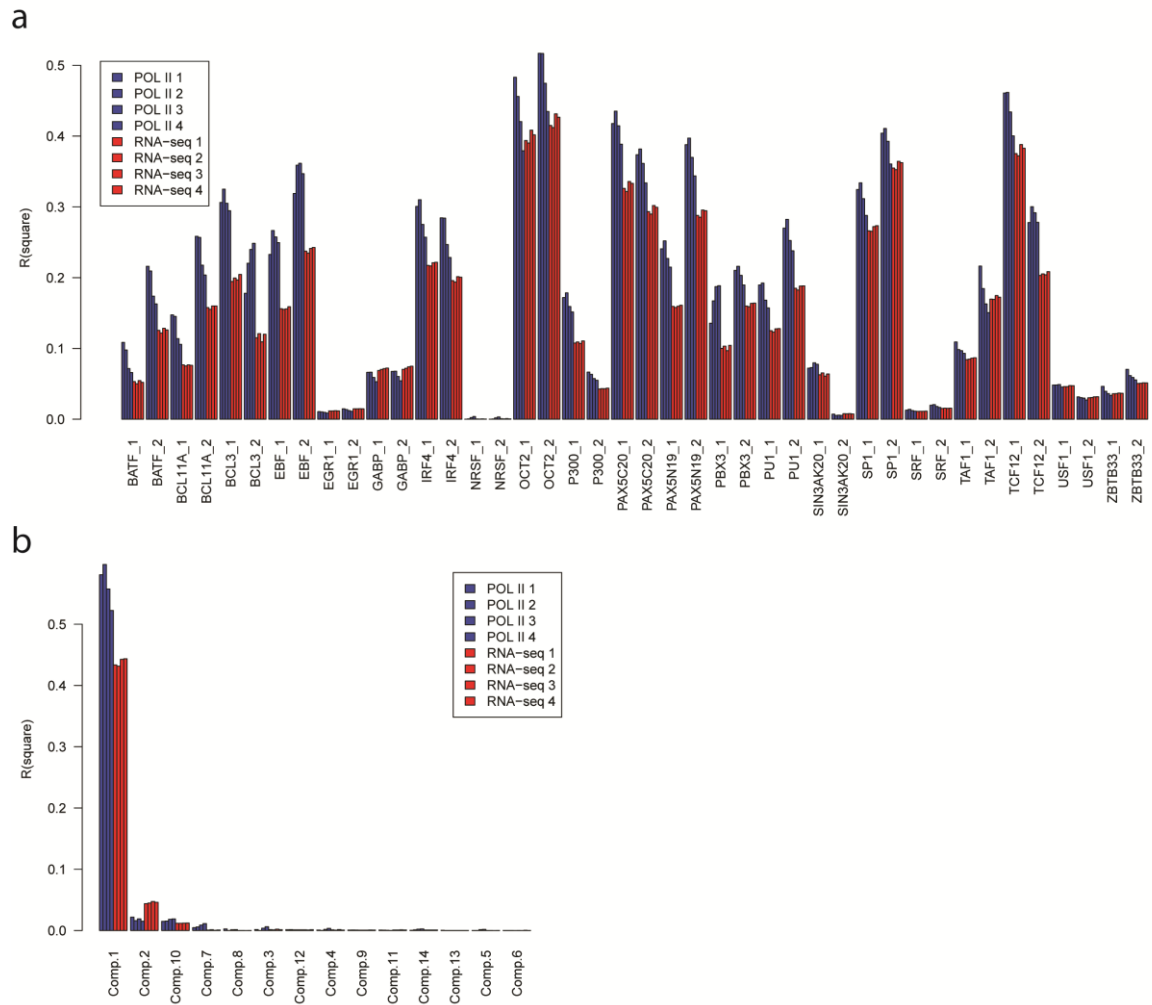

**Supplementary Figure 4 Correlation of TF occupancy with Pol II ChIP-seq and RNA-seq data from ENCODE datasets.** Results of linear regression analysis of Pol II ChIP-seq and RNA-seq with a) transcription factor occupancy and b) individual principal components extracted from TTAS of 21 transcription factors. All transcription factors are presented as two independent biological replicates.

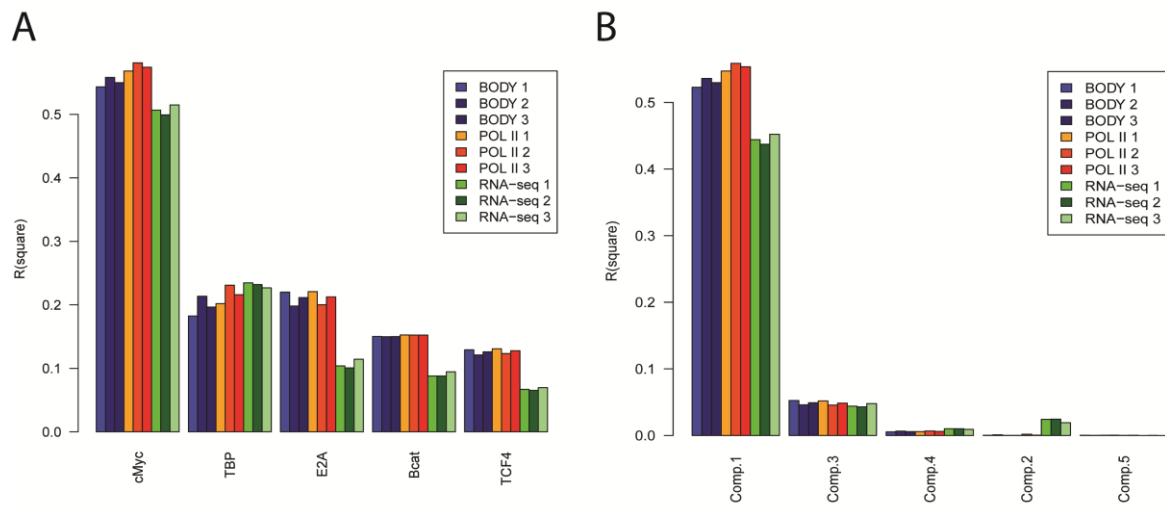

**Supplementary Figure 5: Effect of poised polymerase and polymerase accumulated on 3'-UTRs on correlation of Pol II ChIP-seq with transcription factor occupancy** A) Correlation of Pol II presence in gene body excluding 3'UTR and first 300 bp ("BODY"), Pol II presence in whole gene transcript ("POL II") and by RNA-seq with transcription factor occupancy B) Correlation of Pol II occupancy with individual principal components extracted from TTAS of 5 transcription factors. Excluding pol II tags bound close to transcription start sites and 3'-UTRs has only a minor influence on the correlation of Pol II ChIP-seq data with TF occupancy.

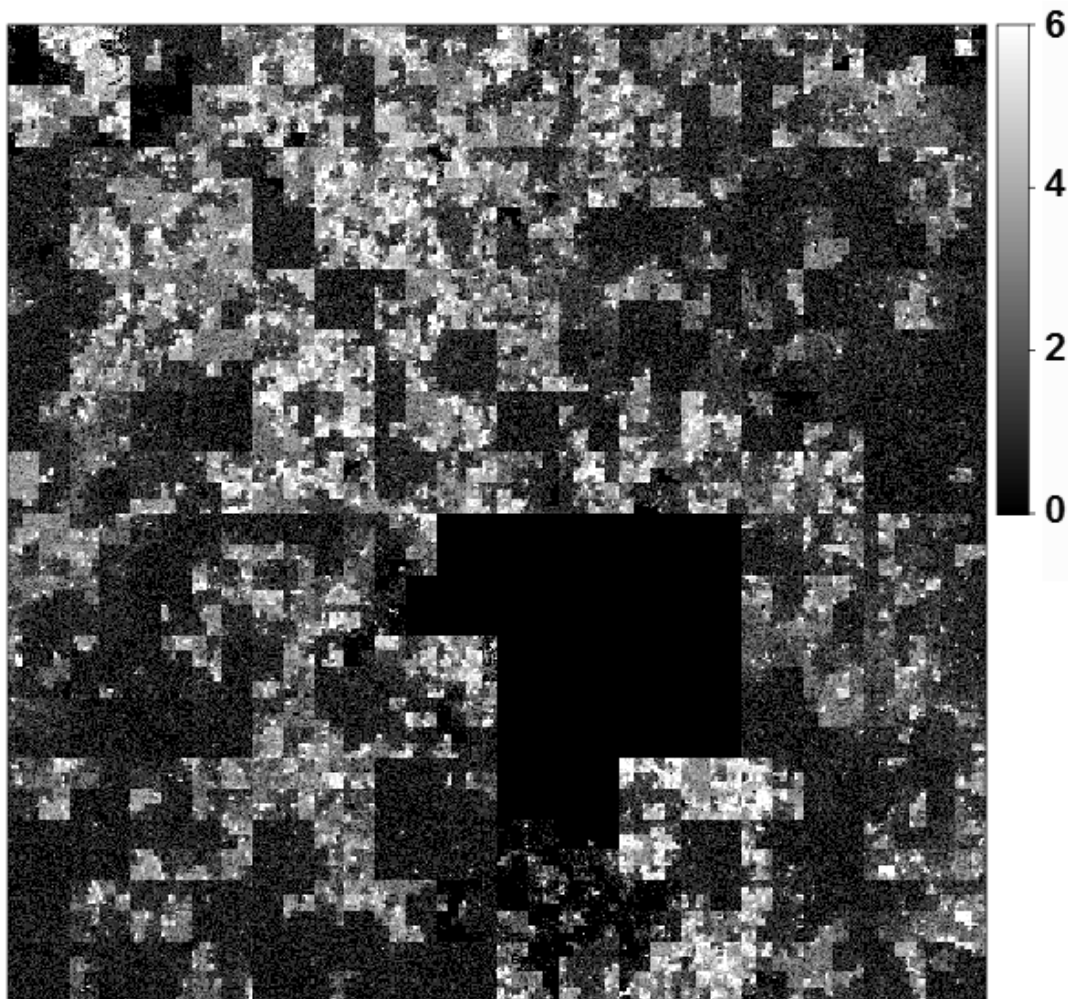

**Supplementary Figure 6 Pol II occupancy on chromosome 1** reveals that major part of chromosome 1 is occupied by Pol II. Pol II occupation is restricted to distinguishable domains. For better visualization of domains, chromosome 1 coordinates are represented as continuous space filling curve (Hilbert curve) (Anders, 2009). Color log<sub>2</sub> scale represents quantile normalized number of Pol II tags mapped to 500bp bins. Large area without coverage of POL II sequencing tags is represents centromere.

Reference:

Anders S (2009) Visualization of genomic data with the Hilbert curve. *Bioinformatics* **25**: 1231-1235

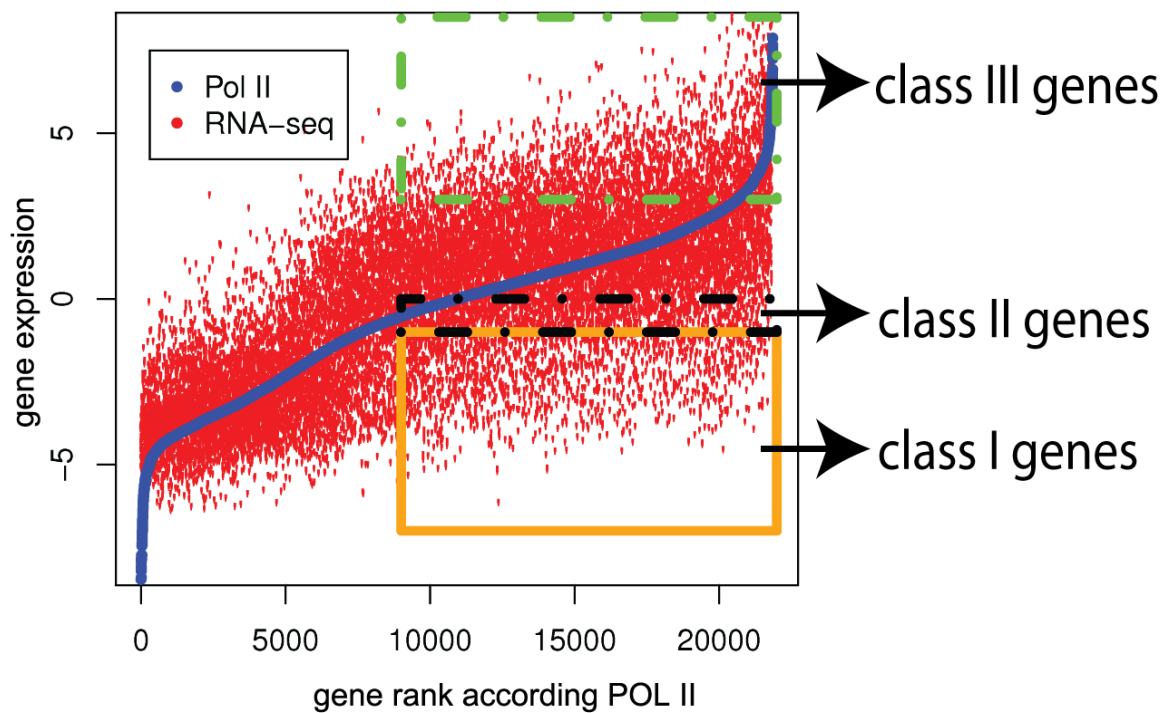

**Supplementary Figure 7 Rank analysis of Pol II occupancy with empirically defined gene classes (I, II, III) used for gene ontology term enrichment analysis.** Genes are ranked according to Pol II ChIP-seq results. Genes in all classes are expressed as defined by Pol II ChIP-seq and seem to be non-expressed (class I), lowly expressed (class II) and very highly expressed (class III) by RNA-seq. All expression values represent median centered and log2 transformed NR100KM (Pol II) and NR10KM (RNA-seq).



## Supplementary Table

### Supplementary Table, Sequencing and mapping statistics

|                               | Sample | Raw reads  | Mapped reads | Mapped reads (q>0) | Percentage mapped | Percentage with q>0 |
|-------------------------------|--------|------------|--------------|--------------------|-------------------|---------------------|
| <b>RNA sequencing</b>         | CON1   | 43,519,947 | 19,409,978   | 11,469,611         | 44.6              | 59.1                |
|                               | CON2   | 32,962,479 | 15,120,183   | 8,890,432          | 45.9              | 58.8                |
|                               | CON3   | 46,869,848 | 20,349,215   | 11,451,852         | 43.4              | 56.3                |
|                               | DOX1   | 31,602,468 | 13,622,531   | 7,625,974          | 43.1              | 56.0                |
|                               | DOX2   | 37,447,267 | 15,428,604   | 9,565,192          | 41.2              | 62.0                |
|                               | DOX3   | 42,341,072 | 15,213,191   | 8,315,499          | 35.9              | 54.7                |
| <b>Pol II ChIP sequencing</b> | CON1   | 65,455,910 | 41,065,573   | 36,186,881         | 62.7              | 88.1                |
|                               | CON2   | 63,256,626 | 41,829,937   | 37,054,927         | 66.1              | 88.6                |
|                               | CON3   | 52,403,736 | 33,479,940   | 29,424,271         | 63.9              | 87.9                |
|                               | DOX1   | 69,649,772 | 35,978,193   | 31,798,338         | 51.7              | 88.4                |
|                               | DOX2   | 57,203,495 | 37,304,546   | 33,257,995         | 65.2              | 89.2                |
|                               | DOX3   | 60,205,429 | 34,741,976   | 30,692,140         | 57.7              | 88.3                |
